# Supplementary material for: A semi-supervised deep learning approach for predicting the functional effects of genomic non-coding variations
Source: PubMed Central journal article supplement (PMC8171027; doi:10.1186/s12859-021-03999-8), 2021-06-02

Figure S1

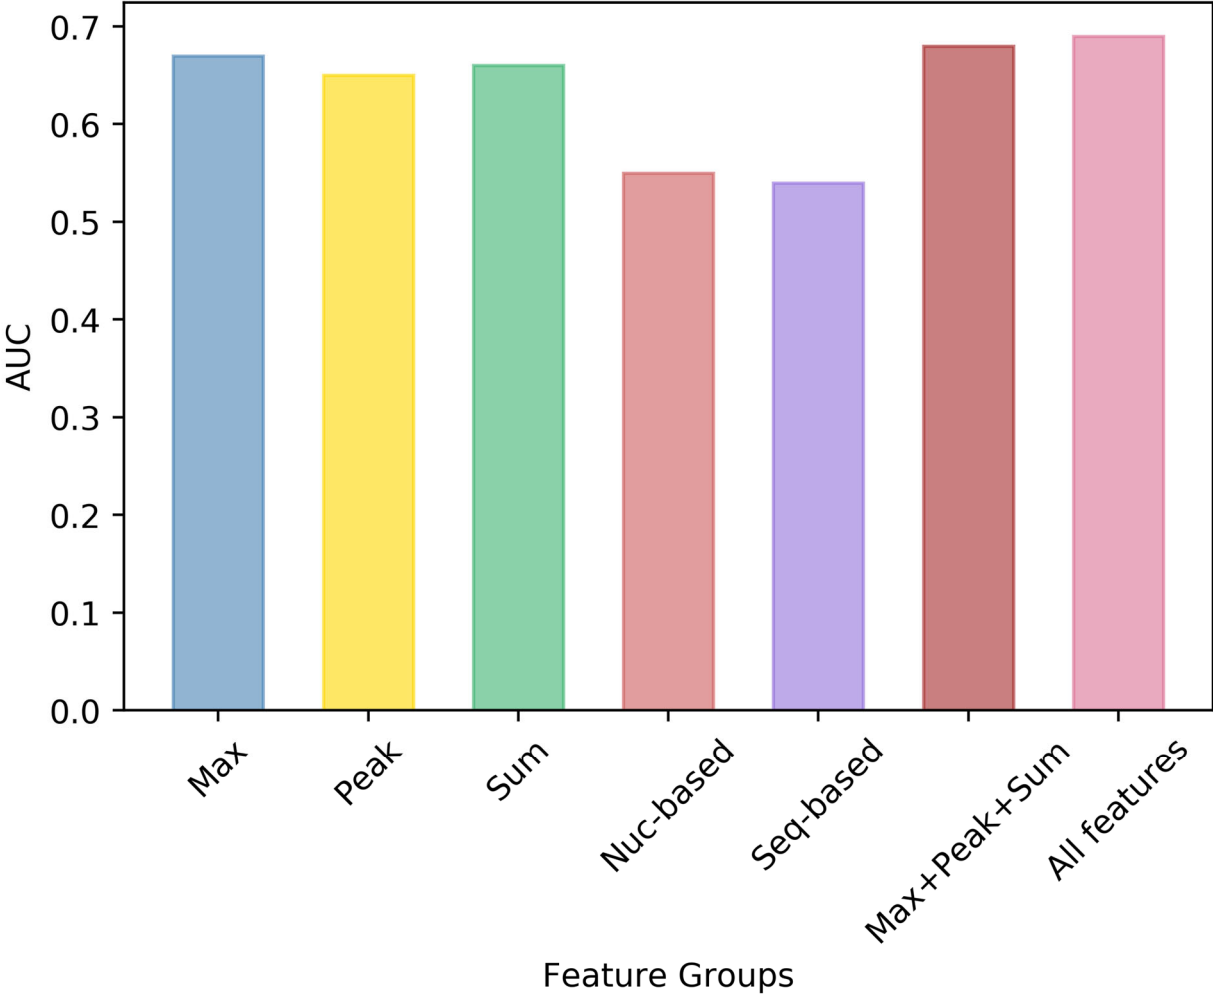

Figure S2

(a)

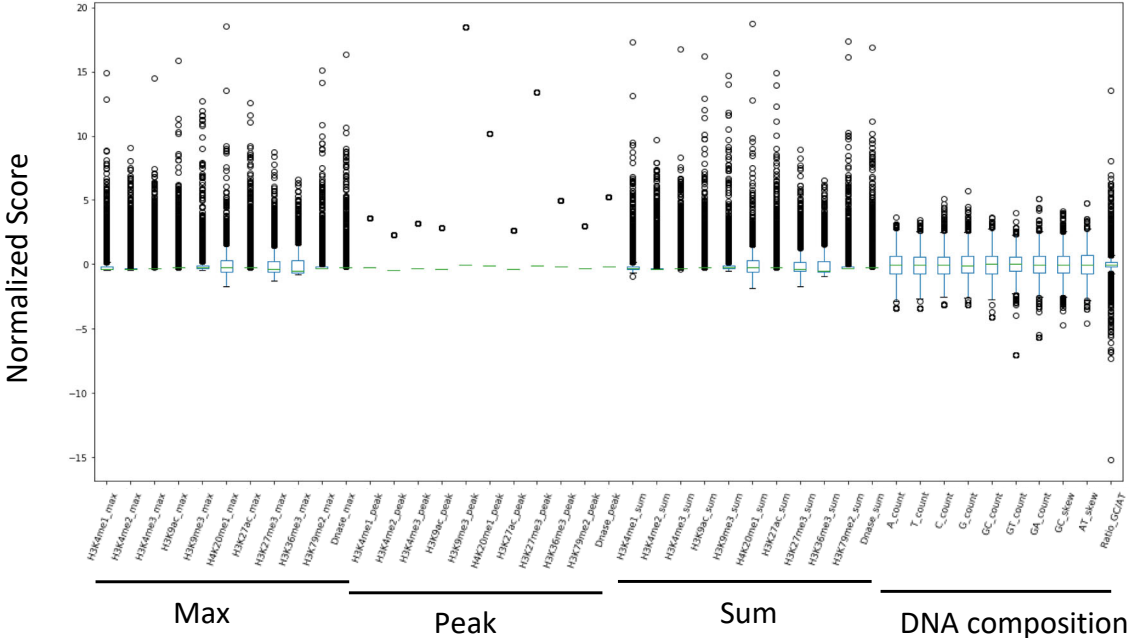

(b)

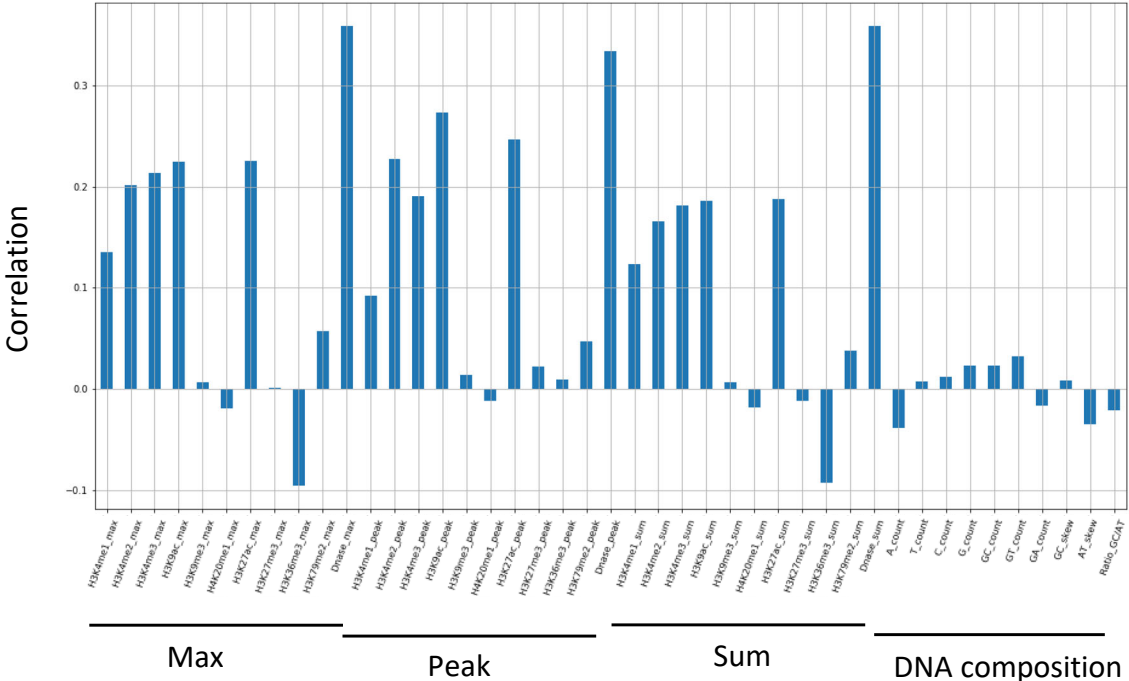

Figure S3

(a)

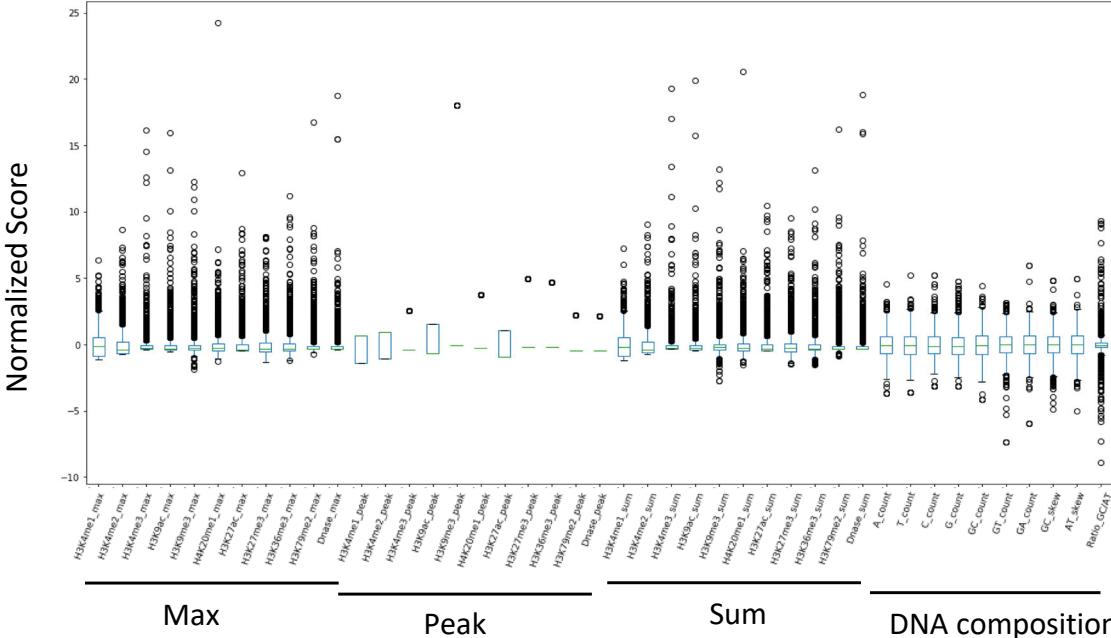

(b)

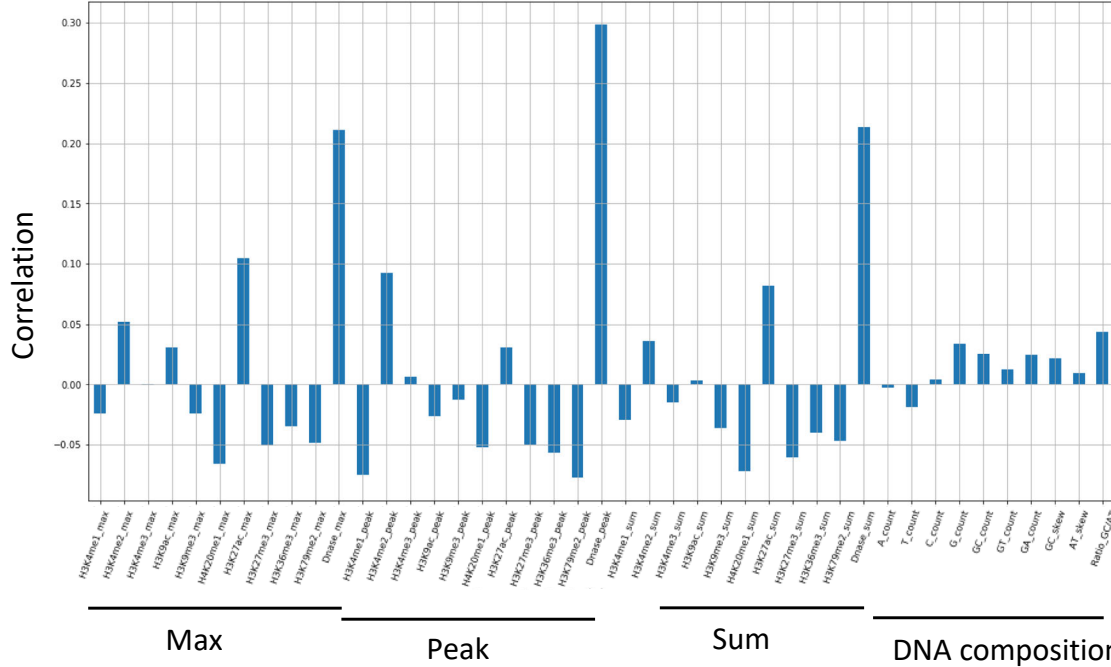

Supplement: 12859_2021_3999_MOESM1_ESM.pdf [file 12859_2021_3999_MOESM1_ESM.pdf]
